# Supplementary material for: A monoclonal antibody acts as a migratory cueviaCa2+ re-wiring
Source: Royal Society of Chemistry journal article supplement (doi:10.1039/c7ib00203c), 2018-02-26
Supplement: c7ib00203c1.pdf [file c7ib00203c1.pdf]

Supplemental Figure 1: Schematic diagram for all transfer vectors used. (A) The anti-VEGFR2 transfer vector contains the self-inactivating promoter (SINp), a packaging signal ( $\Psi$ ), a cytomegalovirus promoter (CMVp) regulating the light chain of TTAC-0001 fused to mCherry (TTAC-0001-LC-RFP), a CMVp regulating the heavy chain of TTAC-0001 (TTAC-0001-HC), a SV40 promoter (SV40p) regulating the blasticidin resistance gene ( $Blast^r$ ), and the 3' LTR. The VEGFR2\_CaRQ transfer vector contained the SINp,  $\Psi$ , a CMVp regulating VEGFR2, a CMVp regulating CaRQ, a CMVp regulating Venus, a SV40p regulating  $Blast^r$ , and the 3' LTR. The VEGFR2\_RCaMP transfer vector contains the SINp,  $\Psi$ , a CMVp regulating VEGFR2, a CMVp regulating pm-RCaMP1.07 (i.e. RCaMP1.07 labelled to the plasma membrane), a SV40p regulating the  $Blast^r$ , and the 3' LTR. The VEGFR2 transfer vector contained the SINp,  $\Psi$ , a CMVp regulating VEGFR2, a CMVp regulating Venus, a SV40p regulating the zeocin resistance gene ( $Zeo^r$ ), and the 3' LTR. The RCaMP transfer vector contains the SINp,  $\Psi$ , a CMVp regulating pm-RCaMP1.07, a SV40p regulating  $Blast^r$ , and the 3' LTR. The CaRQ transfer vector contained the SINp,  $\Psi$ , a CMVp regulating CaRQ, a CMVp regulating Venus, a SV40p regulating  $Blast^r$ , and the 3' LTR. The Null transfer vector contained the SINp,  $\Psi$ , a CMVp regulating a plasma membrane-labelled Cerulean (pm-Cerulean), a SV40p regulating  $Blast^r$ , and the 3' LTR.

Supplemental Video 1: Representative video of VEGFR2+RCaMP cells in response to anti-VEGFR2. Total observation time is 1 minute, 40 seconds. The scale bar represents 50  $\mu\text{m}$ . This experiment was repeated in triplicate (n=3 independent tests).

Supplemental Video 2: VEGFR2+CaRQ cell blebbing in response to anti-VEGFR2. Total observation time is 6 minutes, 40 seconds. The scale bar represents 6  $\mu\text{m}$ . This experiment was repeated in triplicate (n=3 independent tests).

Supplemental Video 3: VEGFR2+CaRQ cell migrates towards an anti-VEGFR2 source cell. Total observation time is 1 hour. Scale bar is 20  $\mu\text{m}$ . This experiment was repeated in triplicate (n=3 independent tests).
